# Supplementary material
Source: PubMed Central journal article supplement (PMC3790613)
Supplement: supp_jc.2013-2411_JC-13-2411_2Tabs.pdf [file supp_jc.2013-2411_JC-13-2411_2Tabs.pdf]

**Supplemental Table 1.** Classification of prolactin deficiency

**Combined prolactin deficiency**

Congenital

Mutations in *POU1F1*, *PROP1*, *LHX3*, *LHX4*, *HESX1*, and *OTX2*  
Mutation in G proteins (pseudo-hypoparathyroidism)

Acquired

Ischemic necrosis of Sheehan syndrome  
Pituitary tumors (mainly non-function adenoma)  
Developmental lesions (mainly craniopharyngioma)  
Auto-inflammatory lesions (hypophysitis, sarcoidosis)  
Infiltrative lesions (hemochromatosis)  
Infections (tuberculosis, histoplasmosis)  
Alkaloids from ergot fungi

**Isolated prolactin deficiency**

**Supplemental Table 2.** Primers used to sequence Prolactin, Prolactin Releasing Peptide, Prolactin Releasing Peptide Receptor, and seven genes involved in the lineage development of lactotrophs.

| Gene          | Exon | Direction | Primer (5' – 3')          |
|---------------|------|-----------|---------------------------|
| <i>PRL</i>    | 1    | Sense     | TCAACAGTTAGAAAGAACAAGGACA |
|               | 1    | Antisense | AACTTTGACAAATCGGCATTTT    |
|               | 2    | Sense     | TGCAATTGTTCTATATGGTTTCG   |
|               | 2    | Antisense | AAAACAAAGAAGCACCAGGAG     |
|               | 3    | Sense     | TGAATTTGTCTCATCATTTCCAG   |
|               | 3    | Antisense | AAGCCTGGATGAAGGACTCA      |
|               | 4    | Sense     | GAGTGGCTCGCGTTCTTATT      |
|               | 4    | Antisense | AGGAAGCCAGAAGCATGGTA      |
|               | 5    | Sense     | CAGGGGACTGAAAATCCTGA      |
|               | 5    | Antisense | ACGCAGTGAGTTGTACACA       |
| <i>PRLH</i>   | 1    | Sense     | ACACAGTGCTCACTCTACCC      |
|               | 1    | Antisense | GCCAGTCGCCAGGCCATGTCTG    |
|               | 2    | Sense     | GAACCTCTGGGTGCCTGTTC      |
|               | 2    | Antisense | AACTTCAGAGTCACCACCAC      |
| <i>PRLHR</i>  | 1    | Sense     | GGTGAGAGGACAACACTTTTTGC   |
|               | 1    | Antisense | G TTCACGCTCACCACCATC      |
|               | 1    | Sense     | CCTGTGCCACCTGGTCTT        |
|               | 1    | Antisense | CCCTAGGAGGCCAGTTGAA       |
| <i>POU1F1</i> | 1    | Sense     | CTCAGAGCCTTCCTGATFTATA    |
|               | 1    | Antisense | TCAAGATTCAAAGCATTCACTCTG  |
|               | 2    | Sense     | CGAATGTGTCTTGAATCCTTATAC  |
|               | 2    | Antisense | GAGCAGGAAACAAGAAGTGGTG    |
|               | 3    | Sense     | GCTCTGGAGAAGGTAGAAGACA    |
|               | 3    | Antisense | AACTACGTCCACAGTAGAGATG    |
|               | 4    | Sense     | GTGTGTAATAGTTGACAAAGATAC  |
|               | 4    | Antisense | CATCTCAAAGAGAAAAGGCGG     |
|               | 5    | Sense     | CTGCGTTGAGATTTTTCTCTAAGG  |
|               | 5    | Antisense | GACTGGTCTCGAGCTCCTGAC     |
|               | 6    | Sense     | CCGTGACTCTCGTGTA ACTCT    |
|               | 6    | Antisense | AAAATAGATAATGTGGCTTCTGAG  |
| <i>PROPI</i>  | 1    | Sense     | GGAAGCAGAGAAATCTCAAGTC    |
|               | 1    | Antisense | AAAGCCAAGGGGTGCTCCAGTC    |
|               | 2    | Sense     | TGGTCCAGCACCGAGGAGCGTC    |
|               | 2    | Antisense | TAATGCCCAACATTCTATGATAGC  |
|               | 3    | Sense     | GTGTCACCACCTATGTCAAGTGT   |
|               | 3    | Antisense | TTCTAATCGGTGAGCTGACCCTCA  |
| <i>LHX3</i>   | 1A   | Sense     | TGGGTCTCAGAGGGGTGA        |
|               | 1A   | Antisense | CTGTCCTCAGTGTCTGCTG       |
|               | 1B   | Sense     | GCAAAGGCGCTCAGAGTC        |
|               | 1B   | Antisense | GCAACAAATACAGGCTGAGG      |

|              |     |           |                               |
|--------------|-----|-----------|-------------------------------|
|              | 2   | Sense     | TCACTGCCTCCTGGTCTACG          |
|              | 2   | Antisense | TGATTGTGAGGGGAGGAGTC          |
|              | 3   | Sense     | CGCTTGCCTCTCTCCAAC            |
|              | 3   | Antisense | GCTTGGGGAGAGAATTTCC           |
|              | 4/5 | Sense     | CTTCCGAGAAGCCTGTGG            |
|              | 4/5 | Antisense | TCCATGGGAAATTCAGATCC          |
|              | 6   | Sense     | GCTGACTGAGCCTCTGCTTC          |
|              | 6   | Antisense | CACCAGCCCTCCCTTGAC            |
| <i>LHX4</i>  | 1   | Sense     | CGGCTTCCACCGTGACTCCAGC        |
|              | 1   | Antisense | GCGGCTGAGGCTGCTAGCTG          |
|              | 2   | Sense     | CACTTGTTCTTACTACTCGT          |
|              | 2   | Antisense | CTCAGCTCCAGGATTTACCT          |
|              | 3   | Sense     | TGAAGAGTCCCAGGCACAAA          |
|              | 3   | Antisense | AGGTGGGACGCCATGAGAAG          |
|              | 4   | Sense     | GTGGTGCAGGAGTCAGTGCCAT        |
|              | 4   | Antisense | ATACCTTCCACCCCTGTCCC          |
|              | 5   | Sense     | CATCGCACTCCCAGACCTGT          |
|              | 5   | Antisense | AGATCCCTCCTGAGTGCCAG          |
|              | 6   | Sense     | TGGTCATGTGTGTTCTAGG           |
|              | 6   | Antisense | CCTAAAAGGCAAGTCTCTT           |
| <i>HESX1</i> | 1   | Sense     | AGCTGTTGCTCTGTGCAGACCACGAG    |
|              | 1   | Antisense | ACAAAGAATTGAAACAATTAAGCTGT    |
|              | 2   | Sense     | TGGAACATAAGATTGACCATCTAAGA    |
|              | 2   | Antisense | AGCCTTTATATTATCATTATTGGGTGA   |
|              | 3   | Sense     | AGCTCATTTTTGGAGACATACTTGAAT   |
|              | 3   | Antisense | TAACATTTCAACATCATGAATAACAACCT |
|              | 4   | Sense     | GAATAATAAAAATAATGTTTCTGAGACC  |
|              | 4   | Antisense | TCATGCTCTGCAATTAGAAGATAATTT   |
| <i>OTX2</i>  | 1   | Sense     | TTTAAAAGCCTCTGCCTCG           |
|              | 1   | Antisense | GAACAGGGTGTTGCATCC            |
|              | 2   | Sense     | GAGAGCATTGGTAGGCTCC           |
|              | 2   | Antisense | TCTCCACAGTCCCATACTCG          |
|              | 3A  | Sense     | GAGCCATTCTTGTCCTTAAGG         |
|              | 3A  | Antisense | GAAGCTGGTGATGCATAG            |
|              | 3B  | Sense     | CCACTGTCAGATCCCTTGT           |
|              | 3B  | Antisense | AATGCCTGGCTAAAACCTGG          |
| <i>LSD1</i>  | 1   | Sense     | AGCGAGGCGAGGCAAGGCTTTT        |
|              | 1   | Antisense | AGTGGTCGCAGGGCCCAAGA          |
|              | 2   | Sense     | GTCCCTAATTTAAATGTTC           |
|              | 2   | Antisense | GATAAAACAGAACTGTGGTT          |
|              | 3   | Sense     | TATTAGGCCTTTATGTCCAG          |
|              | 3   | Antisense | ACTAAGTGGCAAGCATCTAA          |
|              | 4   | Sense     | ACCCGTTTTGTATTCACTTG          |
|              | 4   | Antisense | CATATTCTCTATCAAAGCCA          |
|              | 5   | Sense     | AGCCACTGCAGCCAGCTAAAAG        |

|  |    |           |                           |
|--|----|-----------|---------------------------|
|  | 5  | Antisense | TCAAGGAACCATGAGGCTCC      |
|  | 6  | Sense     | GTGCCCAGCCTTAGAATTAC      |
|  | 6  | Antisense | GTCCTGAAACCGTAACTTAA      |
|  | 7  | Sense     | CAGGTAGTTTCCATATTTTG      |
|  | 7  | Antisense | CACTATCCAAAATACTCTGAGT    |
|  | 8  | Sense     | TTCAAATAGTCTTCAAGTTAAAC   |
|  | 8  | Antisense | ACTAAACGGAAGATGACTAT      |
|  | 9  | Sense     | CTTCATGTTTGTCTTACATATT    |
|  | 9  | Antisense | TATATGCTCATCCATACCAT      |
|  | 10 | Sense     | CATTTCTGTGCCTTGACTTT      |
|  | 10 | Antisense | TCTACAACAACAAACCAGTG      |
|  | 11 | Sense     | ATCTCATTTAAATGGATCTGACCAC |
|  | 11 | Antisense | CCTCAAACAAGACTTGCAGA      |
|  | 12 | Sense     | TCACTTCTAAAATTCAGTGC      |
|  | 12 | Antisense | TCGGAAATGCTTTTAAAATT      |
|  | 13 | Sense     | TTCCCAAATGGAATGATGTAGGT   |
|  | 13 | Antisense | CAAAATTCCCCAGATCTGTG      |
|  | 14 | Sense     | CCAAAACAAAATCTCTCAGCTC    |
|  | 14 | Antisense | CAGGGGATTTAGAAACCTCA      |
|  | 15 | Sense     | ATTTCTTCATATAAGGCACAGC    |
|  | 15 | Antisense | TGATGTCTCTTACTAAAGCTGT    |
